# Supplementary material for: Efficient and continuous furfural hydrogenation to furfuryl alcohol in a micropacked bed reactor
Source: Royal Society of Chemistry journal article supplement (doi:10.1039/d3re00098b), 2023-01-01
Supplement: d3re00098b1.pdf [file d3re00098b1.pdf]

Supporting Information for

**Efficient and continuous furfural hydrogenation to furfural  
alcohol in a micropacked bed reactor**

Lian Duan<sup>a</sup>, Mengmeng Huang<sup>b</sup>, Zipin Peng<sup>b</sup>, Le Sang<sup>a,\*</sup>, Jisong Zhang<sup>b,\*</sup>

*<sup>a</sup>School of Chemistry and Chemical Engineering, Beijing Institute of  
Technology, Beijing 102488, P. R. China*

*<sup>b</sup>State Key Lab of Chemical Engineering, Department of Chemical  
Engineering, Tsinghua University, Beijing 100084, P. R. China*

\*Corresponding author:

E-mail address: lesang@bit.edu.cn. (Le Sang)    jis Zhang@tsinghua.edu.cn. (Jisong  
Zhang)

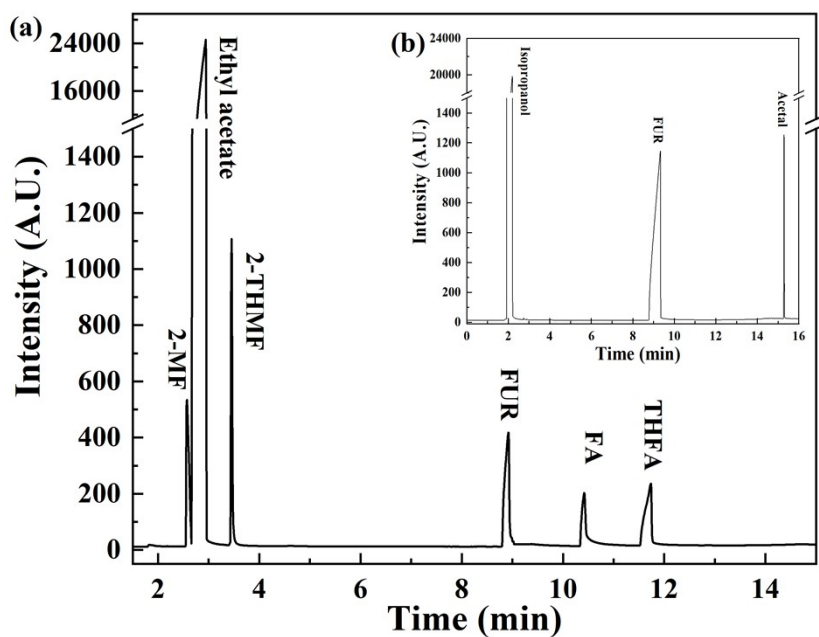

**Fig. S1.** (a) GC chromatogram of FUR hydrogenation product, (b) GC chromatogram of 1.0 mol/L FUR in isopropanol.

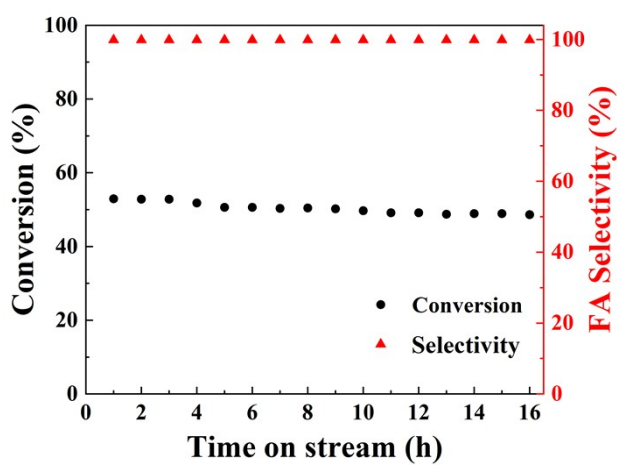

**Fig. S2.** Stability test of the Cu/SiO<sub>2</sub> catalyst in micropacked bed reactor. Reaction conditions: 0.2 mol/L FUR in ethyl acetate, 80 °C, 0.1 MPa, 0.2 mL/min, 20 sccm.

**Table S1.** Effect of operating conditions on FA, THFA, and 2-THMF yield in  $\mu$ PBR with Ni/SiO<sub>2</sub>

| T (°C) | P (MPa) | Q (mL/min) | Conversion (%) | Yield of FA (%) | Yield of THFA (%) | Yield of 2-THMF (%) |
|--------|---------|------------|----------------|-----------------|-------------------|---------------------|
| 40     | 0.6     | 0.2        | 65.5           | 13.3            | 6.2               | 0                   |
| 60     | 0.3     | 0.2        | 93             | 21              | 67.4              | 0                   |
| 60     | 0.6     | 0.2        | 100            | 0               | 75.3              | 2                   |
| 60     | 3.1     | 0.2        | 100            | 0               | 64.2              | 15.4                |
| 60     | 0.3     | 0.1        | 100            | 3               | 77.9              | 4.1                 |
| 60     | 0.6     | 0.1        | 100            | 0               | 73.1              | 4.6                 |
| 100    | 3.1     | 0.2        | 100            | 0               | 50.8              | 23.3                |
| 140    | 3.1     | 0.2        | 100            | 0               | 45.3              | 30.6                |
| 180    | 3.1     | 0.2        | 100            | 0               | 21.4              | 64.1                |
| 180    | 3.1     | 0.1        | 100            | 0               | 18.5              | 67.8                |

Reaction conditions: 0.2 mol/L FUR in isopropanol, 20 scem.

**Table S2.** Effect of temperature in  $\mu$ PBR with Pd/C and Pt/C catalysts

| Catalyst | T (°C) | Conversion (%) | Yield of FA (%) | Yield of 2-MF (%) | Yield of THFA (%) | Yield of 2-THMF (%) |
|----------|--------|----------------|-----------------|-------------------|-------------------|---------------------|
| Pt/C     | 60     | 71             | 30.1            | 1.9               | 6.7               | 0                   |
|          | 100    | 87             | 10.3            | 15.7              | 14.5              | 1.1                 |
|          | 140    | 100            | 0               | 31.2              | 20.9              | 10.1                |
|          | 180    | 100            | 0               | 1.5               | 23.6              | 27.5                |
| Pd/C     | 60     | 100            | 0               | 0                 | 51.8              | 23.8                |
|          | 100    | 100            | 0               | 0                 | 45.3              | 30.6                |
|          | 140    | 100            | 0               | 0                 | 21.4              | 64.1                |
|          | 180    | 100            | 0               | 0                 | 18.5              | 67.8                |

Reaction conditions: 0.2 mol/L FUR in isopropanol, 3.1 MPa, 20 scem.
